# Supplementary material for: Cancer drug resistance related microRNAs: recent advances in detection methods
Source: Royal Society of Chemistry journal article supplement (doi:10.1039/d2an00171c), 2022-01-01
Supplement: d2an00171c1.zip [file d2an00171c1.zip]

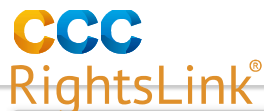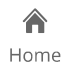

Home

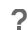

Help ▾

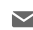

Email Support

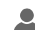

huxinyuan hu ▾

### Colorable Zeolitic Imidazolate Frameworks for Colorimetric Detection of Biomolecules

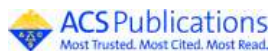**Author:** Jie Zhang, Xing-Yu Wang, Yi-Hui Wang, et al**Publication:** Analytical Chemistry**Publisher:** American Chemical Society**Date:** Sep 1, 2020*Copyright © 2020, American Chemical Society*

#### PERMISSION/LICENSE IS GRANTED FOR YOUR ORDER AT NO CHARGE

This type of permission/license, instead of the standard Terms and Conditions, is sent to you because no fee is being charged for your order. Please note the following:

- Permission is granted for your request in both print and electronic formats, and translations.
- If figures and/or tables were requested, they may be adapted or used in part.
- Please print this page for your records and send a copy of it to your publisher/graduate school.
- Appropriate credit for the requested material should be given as follows: "Reprinted (adapted) with permission from {COMPLETE REFERENCE CITATION}. Copyright {YEAR} American Chemical Society." Insert appropriate information in place of the capitalized words.
- One-time permission is granted only for the use specified in your RightsLink request. No additional uses are granted (such as derivative works or other editions). For any uses, please submit a new request.

If credit is given to another source for the material you requested from RightsLink, permission must be obtained from that source.

[BACK](#)[CLOSE WINDOW](#)
