# Supplementary material for: Cancer drug resistance related microRNAs: recent advances in detection methods
Source: Royal Society of Chemistry journal article supplement (doi:10.1039/d2an00171c), 2022-01-01
Supplement: d2an00171c1.zip [file d2an00171c1.zip]

**Thank you for your order with RightsLink / Elsevier**

no-reply@copyright.com

收件人: huxiny0505@126.com

时 间: 2021-10-17 16:14:06

附 件:

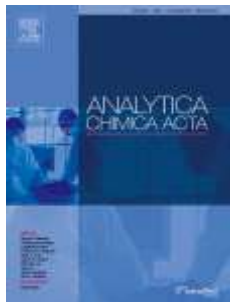**Thank you for your order!**

Dear huxinyuan hu,

Thank you for placing your order through Copyright Clearance Center's RightsLink® service.

**Order Summary**

Licensee: huxinyuan hu  
Order Date: Oct 17, 2021  
Order Number: 5171240555633  
Publication: Analytica Chimica Acta  
Title: A highly sensitive and selective signal-on strategy for microRNA quantification  
Type of Use: reuse in a journal/magazine  
Order Ref: 144  
Order Total: 0.00 USD

View or print complete [details](#) of your order and the publisher's terms and conditions.

Sincerely,

Copyright Clearance Center

Tel: +1-855-239-3415 / +1-978-646-2777  
[customercare@copyright.com](mailto:customercare@copyright.com)  
<https://myaccount.copyright.com>

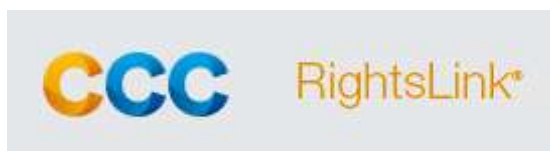

This message (including attachments) is confidential, unless marked otherwise. It is intended for the addressee(s) only. If you are not an intended recipient, please delete it without further distribution and reply to the sender that you have received the message in error.

---
