# Supplementary material for: Cancer drug resistance related microRNAs: recent advances in detection methods
Source: Royal Society of Chemistry journal article supplement (doi:10.1039/d2an00171c), 2022-01-01
Supplement: d2an00171c1.zip [file d2an00171c1.zip]

**Thank You for Your Order on Marketplace™**

no-reply@copyright.com

收件人: huxiny0505@126.com

时 间: 2021-10-15 21:00:12

附 件:

# Marketplace™

Dear huxinyuan hu,

Thank you for placing your order on [Marketplace™](#).**Order Summary:**

Order date: 15 Oct 2021

Order number: 1154636

No. of items: 1

Order total: 0.00 USD

**Billing Summary:**

Payment method: Invoice

An invoice will be generated and emailed within 24 hours.

To view your order details, click the following link, sign in, and search for your order: [Manage Account](#).How was your experience? [Click here to give us feedback](#)

Please do not reply to this message.

To speak with a Customer Service Representative, call +1-855-239-3415 toll free or +1-978-646-2600 (24 hours a day), or email your questions and comments to [support@copyright.com](mailto:support@copyright.com).

Sincerely,

The CCC Marketplace Team

Tel: 1-855-239-3415 / +1-978-646-2600

[support@copyright.com](mailto:support@copyright.com)[Manage Account](#)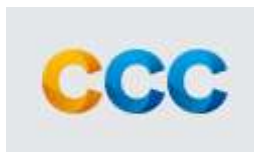

This message (including attachments) is confidential, unless marked otherwise. It is intended for the addressee(s) only. If you are not an intended recipient, please delete it without further distribution and reply to the sender that you have received the message in error.
