# Supplementary material for: Cancer drug resistance related microRNAs: recent advances in detection methods
Source: Royal Society of Chemistry journal article supplement (doi:10.1039/d2an00171c), 2022-01-01
Supplement: d2an00171c1.zip [file d2an00171c1.zip]

Scheme 1, Figure 1, 4, and 5 were drawn by ourselves.
